# Supplementary material for: Comprehensive Analysis Reveals Two Distinct Evolution Patterns of Salmonella Flagellin Gene Clusters
Source: Front Microbiol. 2017 Dec 22;8:2604. doi: 10.3389/fmicb.2017.02604 (PMC5744181; doi:10.3389/fmicb.2017.02604)
Supplement: Table S1 — Complete list of all Salmonella genome sequences. The 214 genomes included 205 Salmonella enterica subsp. enterica and nine genomes of four other subspecies, arizonae, diarizonae, houtenae, and salamae. [file Table1.XLSX]

## Sheet: genome_list
Table S1. Complete list of all Salmonella genome sequences. 214 genomes was included, including 205 Salmonella enterica subsp. enterica and nine genomes of four other subspecies, Arizonae, Diarizonae, Houtenae, and Salamae.
Organism/Name	Strain	Accession Number	Scaffolds	Gene
Salmonella enterica subsp. enterica serovar Abaetetuba str. ATCC 35640	ATCC 35640	NZ_CP007532.1/CP007532.1	-	4617
Salmonella enterica subsp. enterica serovar Abony str. 0014	0014	NZ_CP007534.1/CP007534.1	-	4816
Salmonella enterica subsp. enterica serovar Abortusovis str. SS44	SS44	AUYQ02	213	-
Salmonella enterica subsp. enterica serovar Agona str. SL483	SL483	NC_011149.1/CP001138.1	-	4926
Salmonella enterica subsp. enterica serovar Agona str. 24249	24249	NC_022991.1/CP006876.1	-	4871
Salmonella enterica subsp. enterica serovar Agona str. 460004 2-1	460004 2-1	NZ_CP011259.1/CP011259.1	-	4865
Salmonella enterica subsp. enterica serovar Agona str. 392869-2	392869-2	NZ_CP015024.1/CP015024.1	-	4826
Salmonella enterica subsp. enterica serovar Albany	CVM N51278	LHNN01	43	4777
Salmonella enterica subsp. enterica serovar Albany	CVM N46827	LHIF01	41	4802
Salmonella enterica subsp. enterica serovar Anatum str. CDC 06-0532	CDC 06-0532	NZ_CP007211.1/CP007211.1	-	4772
Salmonella enterica subsp. enterica serovar Anatum str. USDA-ARS-USMARC-1736	USDA-ARS-USMARC-1736	NZ_CP014657.1/CP014657.1	-	4740
Salmonella enterica subsp. enterica serovar Anatum str. USDA-ARS-USMARC-1735	USDA-ARS-USMARC-1735	NZ_CP007584.2/CP007584.2	-	4812
Salmonella enterica subsp. enterica serovar Anatum	GT-01	NZ_CP013222.1/CP013222.1	-	5103
Salmonella enterica subsp. enterica serovar Anatum str. ATCC BAA-1592	ATCC BAA-1592	NZ_CP007531.1/CP007531.1	-	4862
Salmonella enterica subsp. enterica serovar Anatum str. USDA-ARS-USMARC-1175	USDA-ARS-USMARC-1175	NZ_CP007483.1/CP007483.1	-	4976
Salmonella enterica subsp. arizonae serovar 62:z4,z23:-	RSK2980	NC_010067.1/CP000880.1	-	4641
Salmonella enterica subsp. arizonae serovar 62:z36:- str. 5335/86	5335/86	LHTK01	-	4612
Salmonella enterica subsp. arizonae serovar 62:z36:- str. RKS2983	RKS2983	NZ_CP006693.1/CP006693.1	20	4685
Salmonella enterica subsp. enterica serovar Bareilly str. CFSAN000189	CFSAN000189	NC_021844.1/CP006053.1	-	4870
Salmonella enterica subsp. enterica serovar Bareilly str. CFSAN000956	CFSAN000956	JRLQ01	193	4861
Salmonella enterica subsp. enterica serovar Berta	OLC-759	JZUV01	44	4774
Salmonella enterica subsp. enterica serovar Berta	CVM N37918	JYWO01	59	4892
Salmonella enterica subsp. enterica serovar Blegdam	SA20065575	LHSP01	24	4638
Salmonella enterica subsp. enterica serovar Bovismorbificans str. 3114	3114	HF969015.2	2	4813
Salmonella enterica subsp. enterica serovar Bovismorbificans	A1608	CQPI01	53	4660
Salmonella enterica subsp. enterica serovar Bredeney str. CFSAN001080	CFSAN001080	NZ_CP007533.1/CP007533.1	-	4659
Salmonella enterica subsp. enterica serovar Bredeney	CVM N43475	LIMK01	82	4758
Salmonella enterica subsp. enterica serovar Bredeney	CVM N29351	JYTY01	129	5018
Salmonella enterica subsp. enterica serovar Braenderup str. ATCC BAA-664	ATCC BAA-664	AOZM01	75	4784
Salmonella enterica subsp. enterica serovar Braenderup	CVM N50427	LHLL01	38	4752
Salmonella enterica subsp. enterica serovar Brandenburg	CVM N40367	JYYG01	49	4653
Salmonella enterica subsp. enterica serovar Brandenburg	CVM N47716	LHJK01	49	4722
Salmonella enterica subsp. enterica serovar Cerro str. CFSAN001588	CFSAN001588	NZ_CP012833.1/CP012833.1	-	4889
Salmonella enterica subsp. enterica serovar Cerro	87	LELI01	44	4537
Salmonella enterica subsp. enterica serovar Choleraesuis str. SCSA50	A50	NZ_CM001062.1/CM001062.1	-	4892
Salmonella enterica subsp. enterica serovar Choleraesuis	C500	NZ_CP007639.1/CP007639.1	2	4952
Salmonella enterica subsp. enterica serovar Choleraesuis str. SC-B67	SC-B67	NC_006905.1/AE017220.1	-	5163
Salmonella enterica subsp. enterica serovar Chester	ATCC 11997	AOZI01	-	4730
Salmonella enterica subsp. enterica serovar Cubana str. 76814	76814	AYUE01	-	5415
Salmonella enterica subsp. enterica serovar Cubana str. CFSAN002050	CFSAN002050	NC_021818.1/CP006055.1	144	4959
Salmonella enterica subsp. enterica serovar Cubana str. 76814	76814	AZGR01	169	4991
Salmonella enterica subsp. enterica serovar Derby	07CR553	LAZB01	29	4927
Salmonella enterica subsp. enterica serovar Derby	2013LSAL02374	LNCZ01	138	5231
Salmonella enterica subsp. diarizonae	11-01855	NZ_CP011288.1/CP011288.1	-	4691
Salmonella enterica subsp. diarizonae	11-01854	NZ_CP011292.1/CP011292.1	-	4821
Salmonella enterica subsp. diarizonae	11-01853	NZ_CP011289.1/CP011289.1	-	4822
Salmonella enterica subsp. enterica serovar Dublin	SC50_1	LK931502.1	-	5050
Salmonella enterica subsp. enterica serovar Dublin str. CT_02021853	CT_02021853	NC_011205.1/CP001144.1	2	5051
Salmonella enterica subsp. enterica serovar Dublin str. SD3246	3246	NZ_CM001151.1/CM001151.1	1	4505
Salmonella enterica subsp. enterica serovar Eastbourne str. CFSAN001084	CFSAN001084	APAF01	418	4673
Salmonella enterica subsp. enterica serovar Enteritidis str. 18569	18569	NZ_CP011394.1/CP011394.1	-	4846
Salmonella enterica subsp. enterica serovar Enteritidis str. EC20121175	EC20121175	NZ_CP007269.1/CP007269.2	-	4758
Salmonella enterica subsp. enterica serovar Enteritidis str. EC20110361	EC20110361	NZ_CP007263.1/CP007263.1	-	4755
Salmonella enterica subsp. enterica serovar Enteritidis str. EC20120005	EC20120005	NZ_CP007267.2/CP007267.2	-	4758
Salmonella enterica subsp. enterica serovar Enteritidis str. EC20121180	EC20121180	NZ_CP007273.1/CP007273.2	-	4765
Salmonella enterica subsp. enterica serovar Enteritidis str. 77-1427	77-1427	NZ_CP007598.1/CP007598.1	-	4815
Salmonella enterica subsp. enterica serovar Enteritidis str. P125109	P125109	NC_011294.1/AM933172.1	-	4766
Salmonella enterica subsp. enterica serovar Enteritidis str. EC20121179	EC20121179	NZ_CP007272.2/CP007272.2	-	4766
Salmonella enterica subsp. enterica serovar Enteritidis str. CDC_2010K_0968	CDC_2010K-0968	NZ_CP007528.1/CP007528.1	-	4795
Salmonella enterica subsp. enterica serovar Enteritidis str. EC20121178	EC20121178	NZ_CP007271.1/CP007271.2	-	4767
Salmonella enterica subsp. enterica serovar Enteritidis str. EC20110360	EC20110360	NZ_CP007258.1/CP007258.1	-	4752
Salmonella enterica subsp. enterica serovar Enteritidis	Durban	NZ_CP007507.1/CP007507.1	-	4832
Salmonella enterica subsp. enterica serovar Fresno str. ST224	ST224	LHSS01	15	4949
Salmonella enterica subsp. enterica serovar Gaminara str. SA20063285	SA20063285	LHSU01	20	5093
Salmonella enterica subsp. enterica serovar Gaminara str. ATCC BAA-711	ATCC BAA-711	AOZF01	334	5113
Salmonella enterica subsp. enterica serovar Gallinarum str. SG9	SG9	NZ_CM001153.1/CM001153.1	-	4725
Salmonella enterica subsp. enterica serovar Gallinarum str. 287/91	287/91	NC_011274.1/AM933173.1	2	4836
Salmonella enterica subsp. enterica serovar Give str. 564	564	AOZG01	41	4822
Salmonella enterica subsp. enterica serovar Give	CFSAN012622	JOKK01	45	4849
Salmonella enterica subsp. enterica serovar Gallinarum/pullorum str. CDC1983-67	CDC1983-67	NC_022221.1/CP003786.1	-	4465
Salmonella enterica subsp. enterica serovar Gallinarum/pullorum str. FCAV198	FCAV198	AZRG01	-	4686
Salmonella enterica subsp. enterica serovar Gallinarum/pullorum str. RKS5078	RKS5078	NC_016831.1/CP003047.1	128	4881
Salmonella enterica subsp. enterica serovar Hadar	ABBSB1121-1	LAPE01	42	4730
Salmonella enterica subsp. enterica serovar Hadar	ABBSB1020-2	LAPA01	58	4817
Salmonella enterica subsp. enterica serovar Hadar	ABB1048-1	LAOV01	62	4782
Salmonella enterica subsp. enterica serovar Havana str. CFSAN001082	CFSAN001082	APAH01	480	4705
Salmonella enterica subsp. enterica serovar Hartford str. 06-0676	06-0676	ALPO01	47	4849
Salmonella enterica subsp. enterica serovar Hartford str. CFSAN001075	CFSAN001075	APAO01	50	4982
Salmonella enterica subsp. enterica serovar Heidelberg	12-4374	NZ_CP012924.1/CP012924.1	-	5156
Salmonella enterica subsp. enterica serovar Heidelberg str. 41578	41578	NC_021810.1/CP004086.1	-	5103
Salmonella enterica subsp. enterica serovar Heidelberg	N13-01290	NZ_CP012930.1/CP012930.1	-	5329
Salmonella enterica subsp. enterica serovar Heidelberg	SA02DT10168701	NZ_CP012921.1/CP012921.1	-	5012
Salmonella enterica subsp. enterica serovar Heidelberg str. CFSAN002069	CFSAN002069	NC_021812.2/CP005390.2	-	5009
Salmonella enterica subsp. enterica serovar Heidelberg str. B182	B182	NC_017623.1/CP003416.1	-	4895
Salmonella enterica subsp. enterica serovar Heidelberg str. CFSAN002064	CFSAN002064	NZ_CP005995.1/CP005995.1	-	4911
Salmonella enterica subsp. enterica serovar Heidelberg str. SL476	SL476	NC_011083.1/CP001120.1	-	5129
Salmonella enterica subsp. enterica serovar Hillingdon	S01-0588	LHSX01	32	4502
Salmonella enterica subsp. houtenae str. ATCC BAA-1581	ATCC BAA-1581	NZ_CM001471.1/CM001471.1	3	4855
Salmonella enterica subsp. houtenae serovar 16:z4,z32:-- str. RKS3027	RKS3027	ANHR01	97	4383
Salmonella enterica subsp. enterica serovar Hvittingfoss str. SA20014981	SA20014981	LHSW01	12	4955
Salmonella enterica subsp. enterica serovar Infantis str. SARB27	SARB27	NZ_CM001274.1/CM001274.1	-	4779
Salmonella enterica subsp. enterica serovar Infantis	1326/28	NZ_LN649235.1/LN649235.1	2	4907
Salmonella enterica subsp. enterica serovar Inverness	ATCC 10720	AOZD01	-	5128
Salmonella enterica subsp. enterica serovar Indiana str. ATCC 51959	ATCC 51959	AOZC01	72	4826
Salmonella enterica subsp. enterica serovar Indiana	50269	JZTS01	64	4752
Salmonella enterica subsp. enterica serovar Itami str. SA20014991	SA20014991	LHSY01	23	4895
Salmonella enterica subsp. enterica serovar Javiana str. GA_MM04042433	GA_MM04042433	ABEH02	-	4779
Salmonella enterica subsp. enterica serovar Javiana str. 10721	10721	AOZA01	19	4600
Salmonella enterica subsp. enterica serovar Javiana str. CFSAN001992	CFSAN001992	NC_020307.1/CP004027.1	78	4830
Salmonella enterica subsp. enterica serovar Johannesburg	CVM N46815	LHHX01	181	4843
Salmonella enterica subsp. enterica serovar Johannesburg	CVM N51305	LHOL01	51	4584
Salmonella enterica subsp. enterica serovar Kentucky	ABB07-SB3057-2	LAOT01	76	4928
Salmonella enterica subsp. enterica serovar Kentucky	ABBSB1008-2	LAOZ01	260	5023
Salmonella enterica subsp. enterica serovar Kentucky	SALC-205-3	LAPL01	204	5161
Salmonella enterica subsp. enterica serovar Kentucky	ABB1087-1	LAOW01	252	5065
Salmonella enterica subsp. enterica serovar Litchfield	CVM N46829	LHIG01	47	4636
Salmonella enterica subsp. enterica serovar Litchfield	CVM N29367	JYUE01	42	4576
Salmonella enterica subsp. enterica serovar Liverpool	CVM N50444	LHLZ01	44	4750
Salmonella enterica subsp. enterica serovar Liverpool	CVM N46814	LHHW01	89	4943
Salmonella enterica subsp. enterica serovar Livingstone	CKY-S4	JZWK01	31	4866
Salmonella enterica subsp. enterica serovar Livingstone	CVM N45399	LHGD01	163	4825
Salmonella enterica subsp. enterica serovar London	CVM N38882	JYXN01	104	4929
Salmonella enterica subsp. enterica serovar London str. CFSAN001081	CFSAN001081	APAI01	1963	5071
Salmonella enterica subsp. enterica serovar Manhattan str. 111113	111113	CBKW02	18	4714
Salmonella enterica subsp. enterica serovar Manhattan str. SA20034532	SA20034532	LHTB01	12	4634
Salmonella enterica subsp. enterica serovar Mbandaka str. 2009K-0807	2009K-0807	AMRS01	53	4853
Salmonella enterica subsp. enterica serovar Mbandaka	CVM N51315	LHOS01	51	4823
Salmonella enterica subsp. enterica serovar Meleagridis str. 0047	0047	AOYN01	193	4628
Salmonella enterica subsp. enterica serovar Mishmarhaemek	OLC-1602	JZUU01	43	4931
Salmonella enterica subsp. enterica serovar Miami str. 1923	1923	AOYS01	105	4814
Salmonella enterica subsp. enterica serovar Minnesota	ATCC 49284	AOYO01	-	4632
Salmonella enterica subsp. enterica serovar Mississippi str. 2010K-1406	2010K-1406	ALPQ01	142	4988
Salmonella enterica subsp. enterica serovar Milwaukee str. SA19950795	SA19950795	LHTC01	29	5184
Salmonella enterica subsp. enterica serovar Montevideo str. 507440-20	507440-20	NZ_CP007530.1/CP007530.1	-	4763
Salmonella enterica subsp. enterica serovar Montevideo str. USDA-ARS-USMARC-1903	USDA-ARS-USMARC-1903	NZ_CP007222.1/CP007222.1	-	4641
Salmonella enterica subsp. enterica serovar Montevideo str. USDA-ARS-USMARC-1921	USDA-ARS-USMARC-1921	NZ_CP007540.1/CP007540.1	-	4537
Salmonella enterica subsp. enterica serovar Muenchen str. ATCC 8388	ATCC 8388	AOXN01	39	4713
Salmonella enterica subsp. enterica serovar Muenchen	CVM N45942	LHHF01	40	4760
Salmonella enterica subsp. enterica serovar Muenster str. 420	420	AOYW01	53	4824
Salmonella enterica subsp. enterica serovar Napoli	SN310	LFIH01	210	4738
Salmonella enterica subsp. enterica serovar Namur str. 05-2929	05-2929	AWGG01	21	4876
Salmonella enterica subsp. enterica serovar Nchanga str. CFSAN001092	CFSAN001092	APAD01	665	4868
Salmonella enterica subsp. enterica serovar Nchanga str. CFSAN001091	CFSAN001091	APAE01	550	4983
Salmonella enterica subsp. enterica serovar Newport str. CVM 21538	CVM 21538	NZ_CP010282.1/CP010282.1	-	5155
Salmonella enterica subsp. enterica serovar Newport str. CVM 21550	CVM 21550	NZ_CP010283.1/CP010283.1	-	4981
Salmonella enterica subsp. enterica serovar Newport str. SL254	SL254	NC_011080.1/CP001113.1	-	5155
Salmonella enterica subsp. enterica serovar Newport str. CVM 22462	CVM 22462	NZ_CP010280.1/CP010280.1	-	5329
Salmonella enterica subsp. enterica serovar Newport str. CDC 2010K-2159	CDC 2010K-2159	NZ_CP007559.1/CP007559.1	-	4882
Salmonella enterica subsp. enterica serovar Newport str. CVM 22513	CVM 22513	NZ_CP010281.1/CP010281.1	-	4944
Salmonella enterica subsp. enterica serovar Newport str. CVM 22425	CVM 22425	NZ_CP010279.1/CP010279.1	-	4971
Salmonella enterica subsp. enterica serovar Newport str. USMARC-S3124.1	USMARC-S3124.1	NC_021902.1/CP006631.1	-	5074
Salmonella enterica subsp. enterica serovar Newport str. CVM N1543	CVM N1543	NZ_CP010284.1/CP010284.1	-	4892
Salmonella enterica subsp. enterica serovar Newport str. USDA-ARS-USMARC-1927	USDA-ARS-USMARC-1927	NZ_CP007216.1/CP007216.1	-	4753
Salmonella enterica subsp. enterica serovar Norwich str. CFSAN001077	CFSAN001077	APAM01	271	5009
Salmonella enterica subsp. enterica serovar Ohio	CVM N44711	LHFR01	114	4745
Salmonella enterica subsp. enterica serovar Ohio	CVM N29382	JYUJ01	73	4737
Salmonella enterica subsp. enterica serovar Oranienburg str. 701	701	AOYL01	55	4679
Salmonella enterica subsp. enterica serovar Oranienburg str. 0250	0250	AOYM01	138	4335
Salmonella enterica subsp. enterica serovar Panama str. ATCC 7378	ATCC 7378	NZ_CP012346.1/CP012346.1	-	4628
Salmonella enterica subsp. enterica serovar Panama str. SA20030878	SA20030878	LHTD01	44	4912
Salmonella enterica subsp. enterica serovar Paratyphi A str. ATCC 9150	ATCC 9150	NC_006511.1/CP000026.1	-	4707
Salmonella enterica subsp. enterica serovar Paratyphi A str. AKU_12601	AKU12601	NC_011147.1/FM200053.1	-	4703
Salmonella enterica subsp. enterica serovar Paratyphi A	CMCC 50973	NZ_CP009049.1/CP009049.1	-	4744
Salmonella enterica subsp. enterica serovar Paratyphi C str. RKS4594	RKS4594	NC_012125.1/CP000857.1	-	5026
Salmonella enterica subsp. enterica serovar Paratyphi B str. SPB7	SPB7	NC_010102.1/CP000886.1	-	4974
Salmonella enterica subsp. enterica serovar Paratyphi A	CMCC 50503	NZ_CP009559.1/CP009559.1	-	4766
Salmonella enterica subsp. enterica serovar Poona str. ATCC BAA-1673	ATCC BAA-1673	AOYK01	139	5252
Salmonella enterica subsp. enterica serovar Poona str. 2010K-2244	2010K-2244	ARYU01	88	4723
Salmonella enterica subsp. enterica serovar Pomona str. ATCC 10729	ATCC 10729	AHIA01	94	4752
Salmonella enterica subsp. enterica serovar Pullorum	S44987_1	NZ_LK931482.1/LK931482.1	1	4699
Salmonella enterica subsp. enterica serovar Reading	CVM N45396	LHGA01	43	4651
Salmonella enterica subsp. enterica serovar Reading	CVM N43241	JZAK01	46	4692
Salmonella enterica subsp. enterica serovar Rissen str. 150	150	AHUI01	95	4991
Salmonella enterica subsp. enterica serovar Rubislaw str. ATCC 10717	ATCC 10717	AOYA01	-	4787
Salmonella enterica subsp. salamae str. 3588/07	3588/07	CAFD01	138	5203
Salmonella enterica subsp. enterica serovar Saintpaul str. SARA23	SARA23	ABAM02	2	4761
Salmonella enterica subsp. enterica serovar Saintpaul str. JO2008	JO2008	AOXY01	28	4722
Salmonella enterica subsp. enterica serovar Schwarzengrund str. CVM19633	CVM19633	NC_011094.1/CP001127.1	-	4699
Salmonella enterica subsp. enterica serovar Schwarzengrund str. SL480	SL480	ABEJ01	67	4883
Salmonella enterica subsp. enterica serovar Senftenberg str. 423984-1	423984-1	AYDP01	109	5139
Salmonella enterica subsp. enterica serovar Senftenberg str. SS209	SS209	CAGQ01	350	4616
Salmonella enterica subsp. enterica serovar Sloterdijk str. ATCC 15791	ATCC 15791	NZ_CP012349.1/CP012349.1	-	4878
Salmonella enterica subsp. enterica serovar Soerenga str. 695	695	AOXZ01	204	4875
Salmonella enterica subsp. enterica serovar Stanleyville str. CFSAN000624	CFSAN000624	APAR01	-	5249
Salmonella enterica subsp. enterica serovar Stanley str. ATCC 7308	ATCC 7308	AOXV01	184	4869
Salmonella enterica subsp. enterica serovar Stanley str. 06-0538	06-0538	ARYV01	66	4833
Salmonella enterica subsp. enterica serovar Tallahassee str. 0012	0012	AOXS01	230	4716
Salmonella enterica subsp. enterica serovar Tennessee	MOD1_SALC_72	LWIL01	-	4929
Salmonella enterica subsp. enterica serovar Tennessee	FCC0087	LWII01	-	5020
Salmonella enterica subsp. enterica serovar Tennessee str. TXSC_TXSC08-19	TXSC_TXSC08-19	NZ_CP007505.1/CP007505.1	49	4849
Salmonella enterica subsp. enterica serovar Tennessee	CFSAN001387	NZ_CP014994.1/CP014994.1	105	4884
Salmonella enterica subsp. enterica serovar Thompson	RM1986	NZ_CP012514.1/CP012514.1	-	4759
Salmonella enterica subsp. enterica serovar Thompson	RM1984	NZ_CP012513.1/CP012513.1	-	4738
Salmonella enterica subsp. enterica serovar Thompson str. RM6836	RM6836	NC_022525.1/CP006717.1	-	4763
Salmonella enterica subsp. enterica serovar Thompson str. ATCC 8391	ATCC 8391	NZ_CP011396.1/CP011396.1	-	4759
Salmonella enterica subsp. enterica serovar Typhi	MDUST139	CHFY01	70	5003
Salmonella enterica subsp. enterica serovar Typhi str. CT18	CT18	NC_003198.1/AL513382.1	-	4981
Salmonella enterica subsp. enterica serovar Typhi	09-9292	CVQN01	43	4931
Salmonella enterica subsp. enterica serovar Typhi str. P-stx-12	P-stx-12	NC_016832.1/CP003278.1	-	5171
Salmonella enterica subsp. enterica serovar Typhi	PM016/13	NZ_CP012091.1/CP012091.1	-	4996
Salmonella enterica subsp. enterica serovar Typhi str. Ty2	Ty2	NC_004631.1/AE014613.1	-	4981
Salmonella enterica subsp. enterica serovar Typhi	09-4584	CVQG01	42	4828
Salmonella enterica subsp. enterica serovar Typhi str. Ty21a	Ty21a	NC_021176.1/CP002099.1	-	4982
Salmonella enterica subsp. enterica serovar Typhimurium var. 5- str. CFSAN001921	CFSAN001921	NC_021814.1/CP006048.1	-	5195
Salmonella enterica subsp. enterica serovar Typhimurium str. DT2	DT2	NC_022544.1/HG326213.1	-	5027
Salmonella enterica subsp. enterica serovar Typhimurium str. DT104	DT104	NC_022569.1/HF937208.1	-	5199
Salmonella enterica subsp. enterica serovar Typhimurium str. SL1344	SL1344	NC_016810.1/FQ312003.1	-	5233
Salmonella enterica subsp. enterica serovar Typhimurium str. ST4/74	ST4/74	NC_016857.1/CP002487.1	-	5233
Salmonella enterica subsp. enterica serovar Typhimurium	138736	NZ_CP007581.1/CP007581.1	-	5194
Salmonella enterica subsp. enterica serovar Typhimurium str. UK-1	UK-1	NC_016863.1/CP002614.1	-	5026
Salmonella enterica subsp. enterica serovar Typhimurium str. 14028S	14028S	NC_016856.1/CP001363.1	-	5100
Salmonella enterica subsp. enterica serovar Typhimurium str. T000240	T000240	NC_016860.1/AP011957.1	-	4953
Salmonella enterica subsp. enterica serovar Urbana str. ATCC 9261	ATCC 9261	AOXM01	279	4926
Salmonella enterica subsp. enterica serovar Virchow str. SL491	SL491	ABFH02	5	5017
Salmonella enterica subsp. enterica serovar Virchow str. SVQ1	SVQ1	AZMP01	20	4756
Salmonella enterica subsp. enterica serovar Virginia str. SA19971529	SA19971529	LHTI01	14	4872
Salmonella enterica subsp. enterica serovar Weslaco str. 247K	247K	LHTJ01	23	4594
Salmonella enterica subsp. enterica serovar Weltevreden	2511STDY5712385	NZ_LN890524.1/LN890524.1	-	5271
Salmonella enterica subsp. enterica serovar Weltevreden	2511STDY5712384	NZ_LN890522.1/LN890522.1	-	5048
Salmonella enterica subsp. enterica serovar Weltevreden	2511STDY5462413	NZ_LN890520.1/LN890520.1	-	5387
Salmonella enterica subsp. enterica serovar Weltevreden str. 1655	1655	NZ_CP014996.1/CP014996.1	-	5282
Salmonella enterica subsp. enterica serovar Weltevreden	2511STDY5462388	NZ_LN890518.1/LN890518.1	-	5324
Salmonella enterica subsp. enterica serovar Worthington	CVM N45931	LHGV01	55	4883
Salmonella enterica subsp. enterica serovar Worthington	CVM N51304	LHOK01	61	4945
